# Supplementary material for: Population genetic structure of the major malaria vector Anopheles funestus s.s. and allied species in southern Africa
Source: PubMed Central journal article supplement (PMC3533957; doi:10.1186/1756-3305-5-283), 2012-12-06
Supplement: 1756-3305-5-283-S1.pdf [file 1756-3305-5-283-S1.pdf]

### **Supplementary 1. Maximum-likelihood trees.**

The tree inferred from the concatenated *ND5* (a) and *COI* (b) loci with bootstrap percentages for 1,000 replicates and *An. rivulorum* as an outgroup. Bootstrap values under 70% are not shown. A: *An. rivulorum*; B: *An. funestus*-like clade I; C: *An. parensis* clade II; D: *An. funestus* clade I; E: *An. funestus* clade II, *An. parensis* clade I and *An. vaneedeni* clades I; F: *An. funestus*-like clade II; G: *An. vaneedeni* clade II.
